# Supplementary material for: The identification of all five isomers of [(η5-C5H5)2Mo2(CO)5(CNMe)] and the mechanisms of fluxionality †
Source: Royal Society of Chemistry journal article supplement (doi:10.1039/b002849p), 2000-01-01
Supplement: b002849p.doc [file b002849p.doc]

Supplementary data

Table S1. The data from magnetization transfer at -50°C for [Cp2Mo2(CO)5(CNMe)] in [CD3)2NCDO. The data is in the form of peak heights from difference spectra obtained by subtracting a spectrum taken using the pulse sequence {10s-(180° selective)-10s-90°}8 from a spectrum taken using {10s-(180° selective)-time-90°}8, where time is the time given in the table. The heights given against the infinite time, 10s, are from the simple spectrum taken using the pulse sequence {10s-(180° selective)-10s-90°}8 and are not difference spectra.

|  | Invert at  5.67 | | Invert at  5.48 | | Invert at  3.81 | | Invert at  3.59 | |
| --- | --- | --- | --- | --- | --- | --- | --- | --- |
| Time |  5.67 |  5.48 |  5.67 |  5.48 |  3.81 |  3.59 |  3.81 |  3.59 |
| 0.0000 | -6.8140 | -0.7480 | -0.4300 | -12.1930 | -5.1390 | -0.1700 | -0.7030 | -11.8140 |
| 0.0250 | -6.1600 | -1.6310 | -1.1480 | -11.5520 | -4.9900 | -0.2730 | -1.3240 | -10.7820 |
| 0.0500 | -5.7280 | -1.8620 | -1.2930 | -10.7880 | -4.6700 | -0.4530 | -2.7710 | -9.6010 |
| 0.1000 | -5.0570 | -2.8180 | -2.0450 | -9.5400 | -4.1270 | -0.7460 | -3.8940 | -8.0900 |
| 0.2000 | -3.7460 | -3.5110 | -2.5800 | -8.0250 | -3.3490 | -1.0390 | -5.2540 | -5.8140 |
| 0.4000 | -2.7080 | -3.6580 | -2.8220 | -6.1750 | -2.5660 | -1.1660 | -5.9640 | -4.0910 |
| 0.8000 | -1.8580 | -3.0150 | -2.4420 | -4.6280 | -1.8720 | -0.9800 | -5.1790 | -2.8700 |
| 1.6000 | -1.0830 | -1.7970 | -1.5210 | -2.8970 | -1.1810 | -0.6260 | -3.3820 | -1.8500 |
| 10.0000 | 3.79 | 6.65 | 3.79 | 6.61 | 2.87 | 1.53 | 11.76 | 6.22 |

a

b

c

d

Figure S1. The fit of magnetization transfer data from Table S1. The spectra were fitted as described in M. Grassi, B.E. Mann, B.T. Pickup, and C.M. Spencer, *J. Magn. Reson.*, 1986, **69**, 92. with the constraint that the rate of exchange between (**3**) and (**4**) is equal for the three sets of data. The signals inverted are (a).  5.67, (b).  5.48, (c).  5.81, (d).  5.59.

Table S2. The data from magnetization transfer at -50°C for [Cp2Mo2(CO)5(CNMe)] in [CD3)2NCDO. The data is in the form of peak heights from difference spectra obtained by subtracting a spectrum taken using the pulse sequence {20s-(180° selective)-10s-90°}8 from a spectrum taken using {20s-(180° selective)-time-90°}8, where time is the time given in the table. The heights given against the infinite time, 20s, are from the simple spectrum taken using the pulse sequence {20s-(180° selective)-10s-90°}8 and are not difference spectra. The signal at  5.21 was inverted.

| Time |  5.68 |  5.65 |  5.48 |  5.41 |  5.39 |  5.21 |
| --- | --- | --- | --- | --- | --- | --- |
| 0.0000 | 0.0000 | -0.0630 | 0.0000 | -0.5500 | -0.1900 | -15.7530 |
| 0.0500 | 0.0000 | -0.0920 | 0.0000 | -0.6760 | -0.4140 | -14.6030 |
| 0.1000 | -0.0650 | -0.0560 | 0.0000 | -0.7920 | -0.5760 | -13.6170 |
| 0.2000 | -0.1120 | -0.5880 | 0.0000 | -1.2110 | -0.7300 | -11.9110 |
| 0.4000 | -0.2290 | -0.8450 | 0.0000 | -1.9310 | -0.7350 | -9.3970 |
| 0.8000 | -0.3730 | -1.1920 | -0.0640 | -2.5180 | -0.6690 | -6.1980 |
| 1.6000 | -0.3970 | -1.4950 | -0.0760 | -2.4090 | -0.4000 | -3.1810 |
| 3.2000 | -0.2330 | -1.2050 | -0.0600 | -1.3840 | -0.2500 | -1.2980 |
| 6.4000 | -0.0800 | -0.5690 | -0.0300 | -0.4600 | -0.1000 | -0.4050 |
| 20.0000 | 2.00 | 10.94 | 0.68 | 9.34 | 2.00 | 8.54 |
| site popula-tions | 0.5 | 2.8 | 2.8 | 1.9 | 0.7 | 1.9 |

a

b

Figure S1. The fit of magnetization transfer data from Table S2. The spectra were fitted as described in M. Grassi, B.E. Mann, B.T. Pickup, and C.M. Spencer, *J. Magn. Reson.*, 1986, **69**, 92, with the constraint that the rate of exchange between (**1**) and (**3**) and (**4**) are equal. (a) is the complete plot. (b) is an expansion of a) to show the changes in the exchanging signals.

Table S3. The final rate constant matrix from the data in Table S2. The zero entries arise from where the fit showed these rates to be neglible and no mechanism is available for these exchange pathways as a single step. The interconversion between the signals at  5.21 and  5.65 can occur by rotation about the Mo–Mo bond and was left in the calculation.

The signal at  5.68 is the average for both cyclopendienyl groups in (**5**).

The signal at  5.39 is the average for both cyclopentadienyl groups in (**2**). The signal at  5.65 is the average of one cyclopendienyl group from (**3**) and one from (**4**). As a result the rate of exchange between the signal at  5.39 due to (**2**) and those at  5.48 due to (**4**) and and at  5.64 due to (**3**)/(**4**) have been set equal. There is a broad signal due to the other cyclopentadienyl signal due to (**3**) under the signals at  5.68 and 5.65. This was too broad to see and was ignored, but it will have had a small effect on the calculations.

|  |  5.68 |  5.65 |  5.48 |  5.41 |  5.39 |  5.21 |
| --- | --- | --- | --- | --- | --- | --- |
|  5.68 | -1.4552 | 0.0000 | 0.0000 | 0.0000 | 0.7930 | 0.0000 |
|  5.65 | 0.0000 | -0.7710 | 0.0000 | 0.0000 | 1.5612 | 0.0526 |
|  5.48 | 0.0000 | 0.0000 | -0.7710 | 0.0526 | 1.5612 | 0.0000 |
|  5.41 | 0.0000 | 0.0000 | 0.0357 | -1.5936 | 3.2462 | 0.0000 |
|  5.39 | 1.1102 | 0.3903 | 0.3903 | 1.1960 | -10.7529 | 1.1960 |
|  5.21 | 0.0000 | 0.0357 | 0.0000 | 0.0000 | 3.2462 | -1.5936 |
